# Supplementary material
Source: PubMed Central journal article supplement (PMC1949015)
Supplement: 7601801s1.pdf [file 7601801s1.pdf]

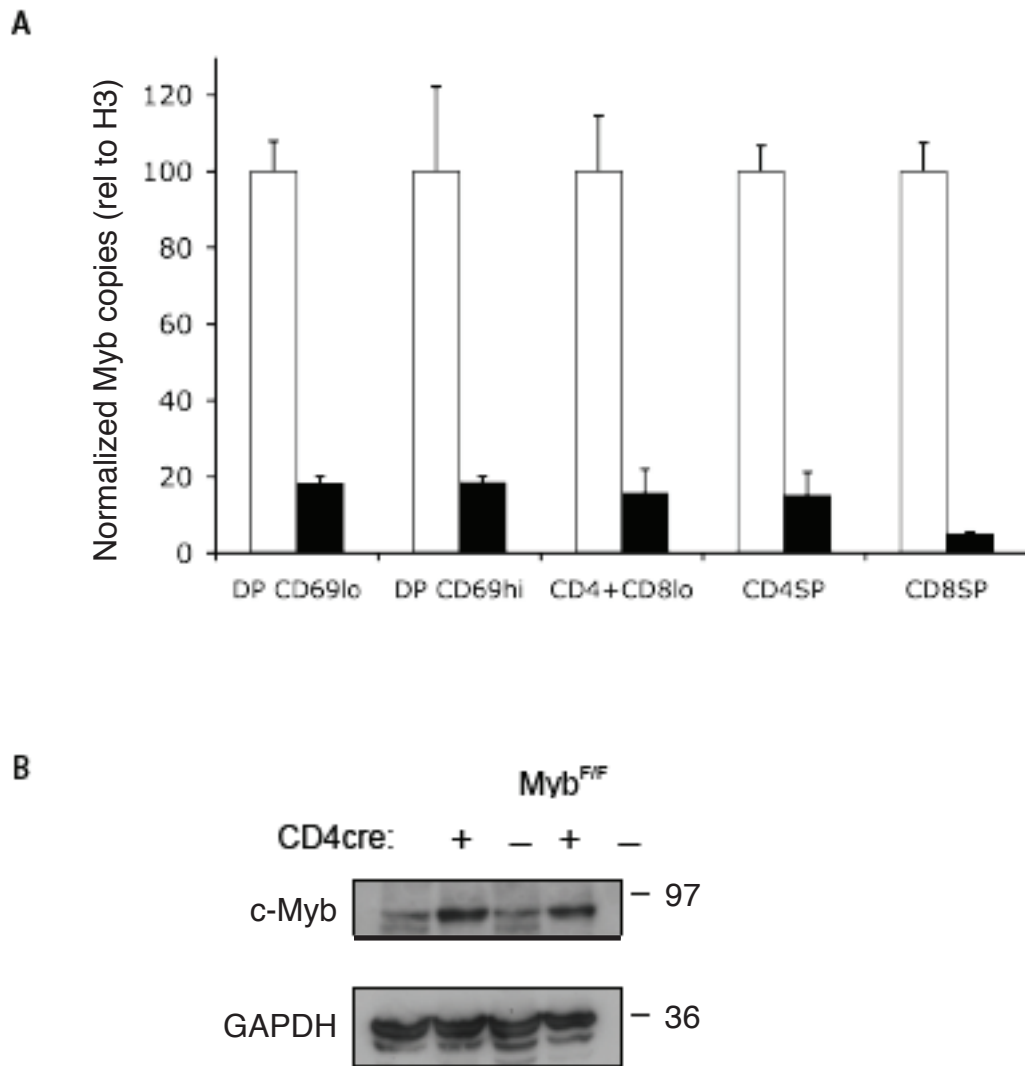

Supplementary Figure 1.

A. c-Myb genomic DNA levels in sorted thymocyte subsets from Myb<sup>F/F</sup> CD4Cre versus Myb<sup>F/F</sup> mice. qPCR analysis of Myb exon 5 to intron 5 from genomic DNA extracted from sorted T lymphocytes of Myb<sup>F/F</sup> or Myb<sup>F/F</sup> CD4Cre mice. Data were analysed by the relative standard curve method (ABS) and are presented as means from triplicate qPCR reactions performed from a single sort. Error bars represent standard deviations. Primers used were: for histone H3; CCGGCGCTACCAGAAGTC and ACCGAGCTGCTGATCC; for Myb GAAAGTGAGAAAGTTTTATTGTTTTTCATTCA GTCT and CAGGACCACAGACACTTGTAT. White bars: Myb<sup>F/F</sup> thymocytes. Black bars: Myb<sup>F/F</sup> Cd4Cre thymocytes. B. c-Myb protein levels in thymic extracts from Myb<sup>F/F</sup> CD4Cre versus Myb<sup>F/F</sup> mice. Antibodies used were anti-c-Myb (Upstate Biotech) or anti-GAPDH (Research Diagnostics). Protein bands were visualized using ECL Plus (Amersham Biosciences).
