# Supplementary material
Source: PubMed Central journal article supplement (PMC1949015)
Supplement: 7601801s2.pdf [file 7601801s2.pdf]

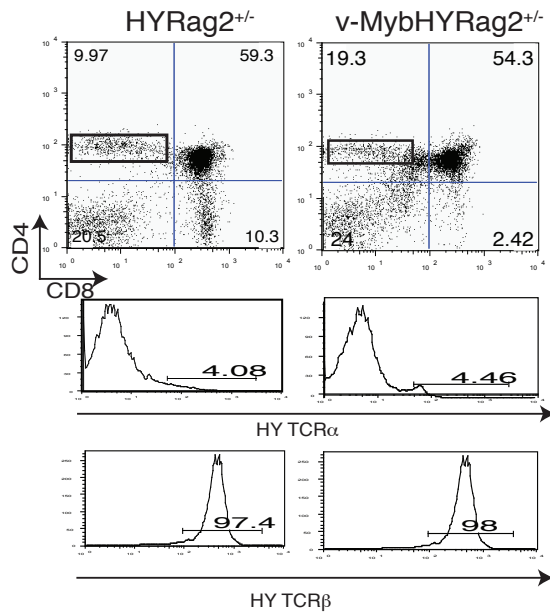

Supplementary Figure 2.

CD4SP mature thymocytes from vmybHYRAG2<sup>+/-</sup> mice do not express the HYTCR transgenic  $\alpha$  chain. Thymocytes from HYRAG2<sup>+/-</sup> and vMybHYRAG2<sup>+/-</sup> mice were stained for CD4 and CD8 expression (top panels). Mature CD4 SP thymocytes were then gated and analysed for expression of HY TCR $\alpha$  (T3.70) (centre panels) and HY TCR $\beta$  (H57-597) (lower panels). Although 98% of the mature CD4SP express the transgenic HY TCR $\beta$  chain, only 5% express the transgenic HY TCR $\alpha$  chain; the rest express endogenously rearranged TCR $\alpha$  (data not shown).
