# Supplementary material
Source: PubMed Central journal article supplement (PMC1949015)
Supplement: 7601801s3.pdf [file 7601801s3.pdf]

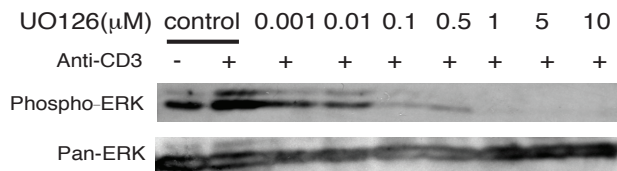

Figure 3. Increasing doses of UO126 inhibit ERK phosphorylation after anti-CD3 crosslinking.

Thymocytes ( $1 \times 10^7$ /ml) were stimulated with  $10 \mu\text{g/ml}$  anti-CD3 (2C11) and washed in medium (RPMI medium plus 10% FCS and  $\beta$ ME). Cells were treated with UO126 at the concentrations shown for 15 min at 37C, and bound antibody was then crosslinked by the addition of  $75 \mu\text{g/ml}$  of goat anti-hamster Ig for 2min. Stimulation was terminated by placing cells on ice in RIPA buffer. Total cell extracts were analysed for phospho-ERK (anti-phosphoMAPK; Cell Signaling) and anti-ERK2 (D2) (SC-1647; Santa-Cruz Biotech, Inc) by immunoblot.
